# Supplementary material for: Crosstalk between the serine/threonine kinase StkP and the response regulator ComE controls the stress response and intracellular survival of Streptococcus pneumoniae
Source: PLoS Pathog. 2018 Jun 8;14(6):e1007118. doi: 10.1371/journal.ppat.1007118 (PMC6010298; doi:10.1371/journal.ppat.1007118)
Supplement: S3 Table — (XLSX) [file ppat.1007118.s012.xlsx]

## Sheet: Hoja1
				Table S3. List of ComE-regulated genes as determined by RNAseq analysis
				Categories of genes	List of ComE-regulated genes	Fold changes1	p
				oxidative stress	spr0642 spxB (pyruvate oxidase)	-18.2499	5e-05
				response	spr0643 (glyoxalase)	-9.75701	0.00565
					spr1495 tpxD or psaD (thiol peroxidase)	-2.72956	0.02845		Fold
					spr0674 sodA (superoxide dismutase)	-2.8154	0.01825		changes
					spr1175 flaV (flavodoxin)	-3.17137	0.0185	-20
					spr1064 nrdH (glutaredoxin-like protein)	-2.7475	0.037	-10
				purine/pyrimidine	spr1663 pbuX (uracil / xhantine permease)	-4.89358	0.00745	-5
				metabolism	spr1662 xpt (xanthine phosphoribosyltransferase )	-4.89358	0.00745	-3
					spr0022 ada (adenosine deaminase)	-3.22928	0.03215	-2
					spr1128 guaC (GMP oxidoreductase)	-3.07694	0.0172	2
					spr1165 pyrP (uracil permease)	-2.985	0.02415	5
					spr1090 udK (uridine kinase)	-2.73957	0.0192	10
				metabolism	spr0415 pfl (pyruvate formate lyase)	-6.65414	0.0002	>20
					spr0026 pca (carbonic anhydrase)	-3.70204	0.0054
					spr1358 pgl (6-phosphogluconolactonase)	-2.98183	0.0211
					spr0887 gpmB (phosphoglycerate mutase)	-2.37757	0.0372
					spr0234 gldA (fructose-6-phosphate aldolase)	2.46299	0.0376
					spr1834 ptcC (PTS system transporter subunit IIC)	3.0743	0.0162
					spr0226 pflE (pyruvate formate-lyase 3)	3.21364	0.0331
					spr0135 epsG (exopolysaccharide biosynthesis)	3.38541	0.0447
					spr1468 ywnB (putative NADH-flavin reductase)		0.00175
					spr1185 nagC (sugar kinase, NBD/HSP70 family)		0.03335
					spr0280 celC (PTS system, cellobiose transporter )		0.0409
				amino acid metabolism	spr0918 asd (aspartate-semialdehyde dehydrogenase)	-3.31264	0.0301
					spr0729 folD ( tetrahydrofolate interconversion)	-2.61806	0.0395
					spr1120 glnP, spr1121 glnQ (glutamine ABC transporter)	-2.5722	0.0343
					spr1938 ulaA (ascorbate phosphotransf system)	3.57438	0.01505
				metabolite transport	spr2004 ABC-MSP (sugar ABC transporter)	-8.90591	0.00015
					spr2002 ABC-NBD (ABC_NrtD_SsuB_transporters;)	-5.24172	0.00035
					spr0327 aliA (oligopeptide ABC transporter )	-2.78028	0.0272
					spr0619 ABC-NBD,spr0618	2.88278	0.02715
					spr1546 ABC-NBD (ABC transporter ATP-binding protein)	3.39711	0.02675
					spr1801 ABC-NBD (ABC transporter ),spr1800	3.48342	0.0287
					spr1281 ABC-NBD (ABC transporter ATP-binding protein)	3.77344	0.04345
					spr1939 (PTS system transporter subunit IIB)		5e-05
					spr0424 lacG (PTS system transporter subunit IIB)		0.00075
					spr0811 (ABC transporter bacitracin susceptibility)		0.00935
				ribosomal structures,	spr1177 rpmE2 (50S ribosomal protein L31)	-4.1187	0.00165
				translation	spr1467 rpsO (30S ribosomal protein)	-4.02625	0.00135
					spr0920 trmE (tRNA modification GTPase)	-3.29163	0.0123
					spr0271 rplM (50S ribosomal protein L13)	-3.19922	0.01275
					spr0248 rpsI (30S ribosomal protein S12)	-3.0598	0.01135
					spr0189 rplD (50S ribosomal protein L4),	-2.92397	0.03345
					spr0190 rplW (50S ribosomal protein L23)	-2.92397	0.03345
					spr0248 rpsL (30S ribosomal protein S12)	-2.76087	0.0194
					spr0187 rpsJ (30S ribosomal protein S10)	-2.53957	0.03075
					spr0626 lysS (lysyl-tRNA synthetase)	-2.54778	0.0265
					spr1014 rpmA (50S ribosomal protein L27)	-2.47169	0.03615
					spr1931 hisS (histidyl-tRNA synthetase)	-2.40453	0.04145
					spr0191 rplB (50S ribosomal protein L2)	-2.29592	0.0442
					spr1116 rimI ,spr1117 rimL (acetyltransferases)	3.13602	0.00975
					spr2011 raiA (ribosome-associated translation inhibitor)	3.85314	0.00265
					sprt19 tRNA-Met3		0.03905
					sprt36 tRNA-Thr3		0.00105
					sprt25 tRNA-Leu3		0.00435
					sprt13 tRNA-Ile1		0.02295
					sprt28 tRNA-Val1		0.03205
					sprt38 tRNA-Lys3		0.03205
					sprt50 tRNA-Ser4		0.03205
					sprt21 tRNA-Arg3		0.03335
					sprt33 tRNA-Arg4		0.03335
					sprt16 tRNA-Met1		0.0409
				bacteriocin/ bacteriocin	spr1352 bta (bacterocin transport)	-3.58701	0.006
				transport	spr1765 pneA1 (bacteriocin)	2.50973	0.0329
					spr0128 (class IIb bacteriocin)		0.03335
				molecular chaperones	spr1993 hslO (chaperonine, oxidative stress)	-3.5709	0.00755
					spr0456 dnaJ (chaperone)	-2.32056	0.0447
				gene regulation	spr1731 lytT (DNA-binding response regulato)	-3.11155	0.0168
					spr0228 deoR (transcriptional regulator)	3.46714	0.01735
					spr1720 (transcriptional regulator, Rgg family)		0.00605
					spr1301 mngR ( transcription regulator, GntR family)		0.00665
					spr1946 albA_2 (putative regulator)		0.00665
					spr1752,spr1753 hipB (transcriptional regulator)		0.02945
					spr0225 araC (regulatory protein)		0.0409
				cation transport	spr0905 yfnA (cationic amino acid transporter)	-2.85273	0.03705
				cell wal biosynthesis	spr0890 acm (Lyzozyme M1, 1,4-beta-N-acetylmuramidase)	-2.64927	0.03195
					spr0989 murZ (UDP-N-Ac-gluc 1-carboxyvinyltransferase)	-2.56811	0.0276
					spr0541 murN (lipid II-Ala:alanyl-tRNA ligase)	2.44457	0.03015
				cell division	spr2046 spo0J/parB (chromosome segregation protein )	2.56768	0.02665
				iron metabolism	spr1684 fatD, spr1685 fatC (iron transport system)	3.35521	0.0031
					spr1686 fecE (iron transport system),	3.35521	0.0031
					spr1687 fatB (iron-compound ABC transporter )	3.80141	0.0046
				others	spr0722 (transposase_A)	-7.28595	0.00705
					spr0312 (degenerated transposase)	-4.07871	0.0076
					spr1660 exoA (major exonuclease)	-3.74839	0.00565
					spr0679 ppiA (peptidyl-prolyl- cis-trans isomerase)	-3.60531	0.0156
					spr1038 (transposase_A)	-3.20579	0.0195
					spr1790 yidC2 (protein insertase)	-3.49644	0.00765
					spr0364 spi (signal peptidase I)	-2.84483	0.01455
					spr1907 dapD (tetrahydrodipicolinate acetyltransferase)	-2.56746	0.0412
					spr1544 secA (pre-protein translocase)	-2.47552	0.0277
					spr1858 comGG/cglG (cell wall channel)		0.00735
					,spr1859 comGF (cell wall channel)		0.00735
					spr1934 paaD (metal-sulfur cluster biosynthetic enzyme)		0.0409
					spr0020 comW (competence factor)		0.0003
				unknown	spr1091	-3.11741	0.0225
					spr0080	-2.71813	0.03015
					spr1093	2.52406	0.04485
					spr1484	2.82282	0.01415
					spr0703	3.30135	0.0102
					spr0806	3.39612	0.00995
					spr1406	3.81382	0.04265
					spr1914		0.00175
					spr0407		0.03205
					spr1873		0.03205
					spr1987		0.03335
					spr0742		0.0409
				1, gene expression values in thecomET128A mutant to the wt strain (comET128A/wt)
